# Supplementary material
Source: publisher figshare collection journal article supplement (https://tandf.figshare.com/articles/dataset/_/6886520)
Supplement: Supplementary file 1 [file 1]

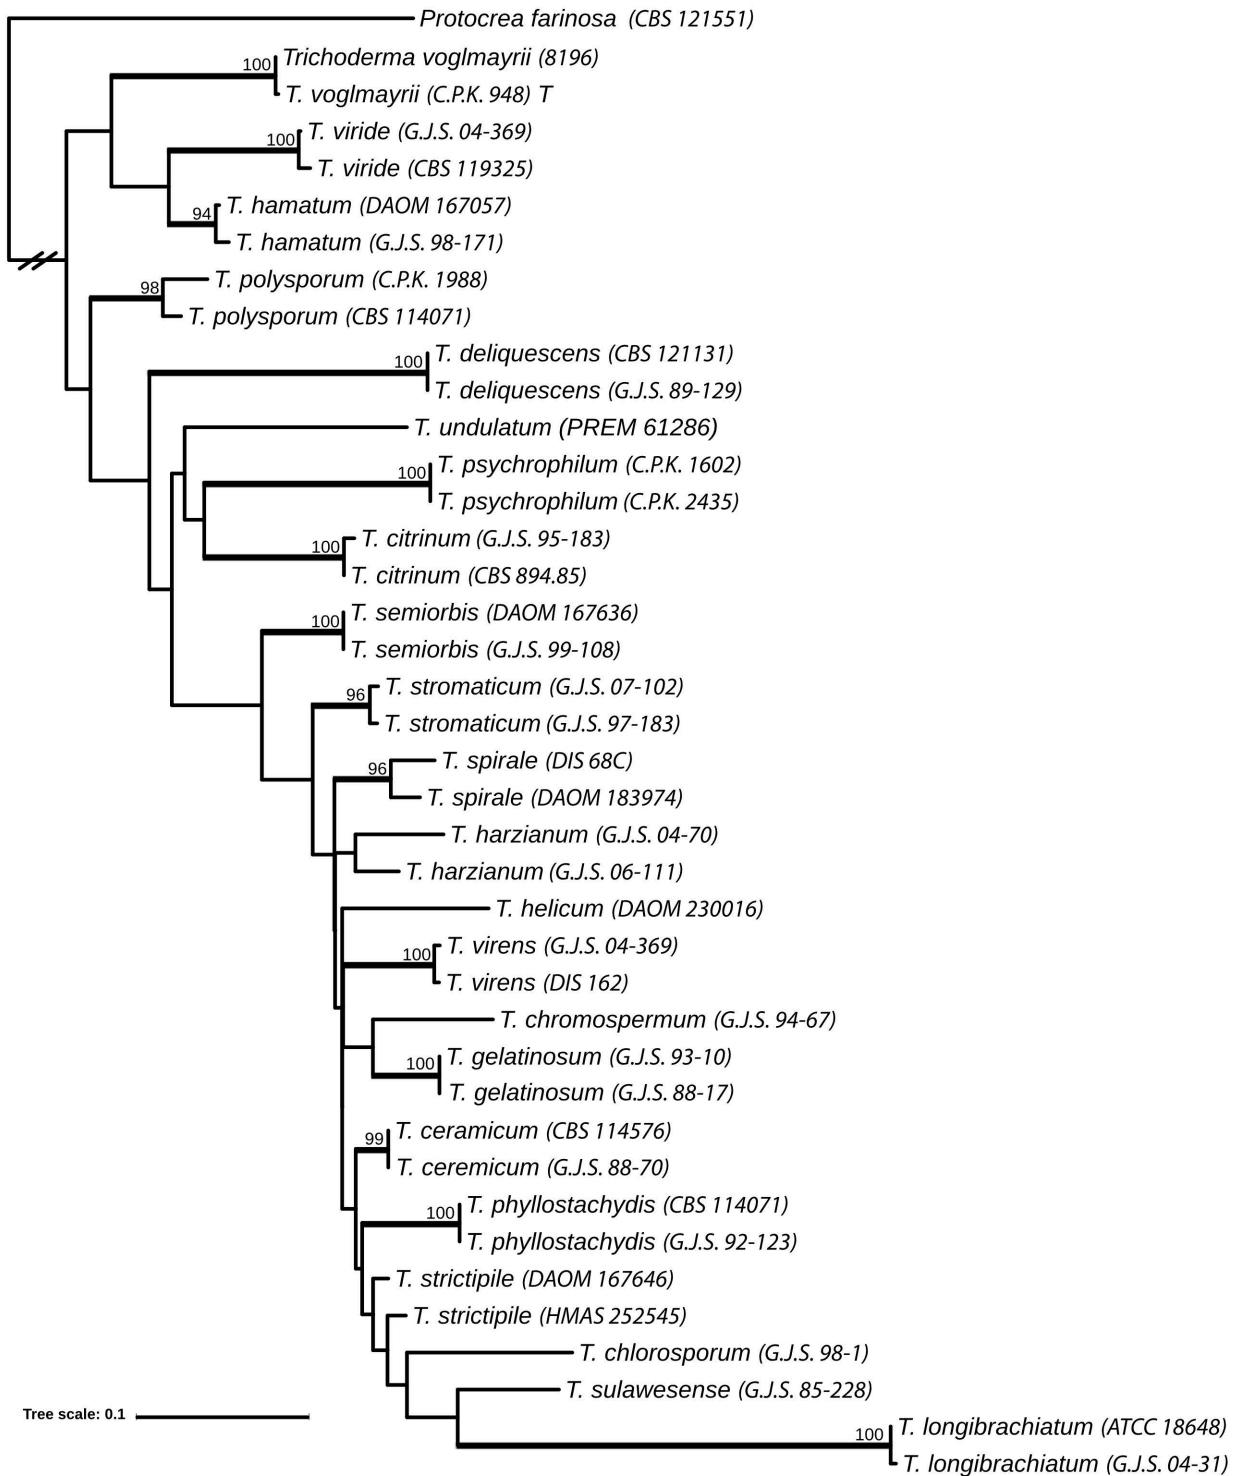

**Supplementary Figure 10.** Maximum likelihood phylogenetic tree of representative *Trichoderma* spp. from different clades within the genus. The tree was reconstructed based on an *RPB2* sequence dataset. Bootstrap values, as well as posterior probability scores from a Bayesian analysis of the same dataset, are indicated at well supported nodes together with thickened branches.
