# Supplementary material
Source: publisher figshare collection journal article supplement (https://tandf.figshare.com/articles/dataset/_/6886520)
Supplement: Supplementary file 2 [file 1]

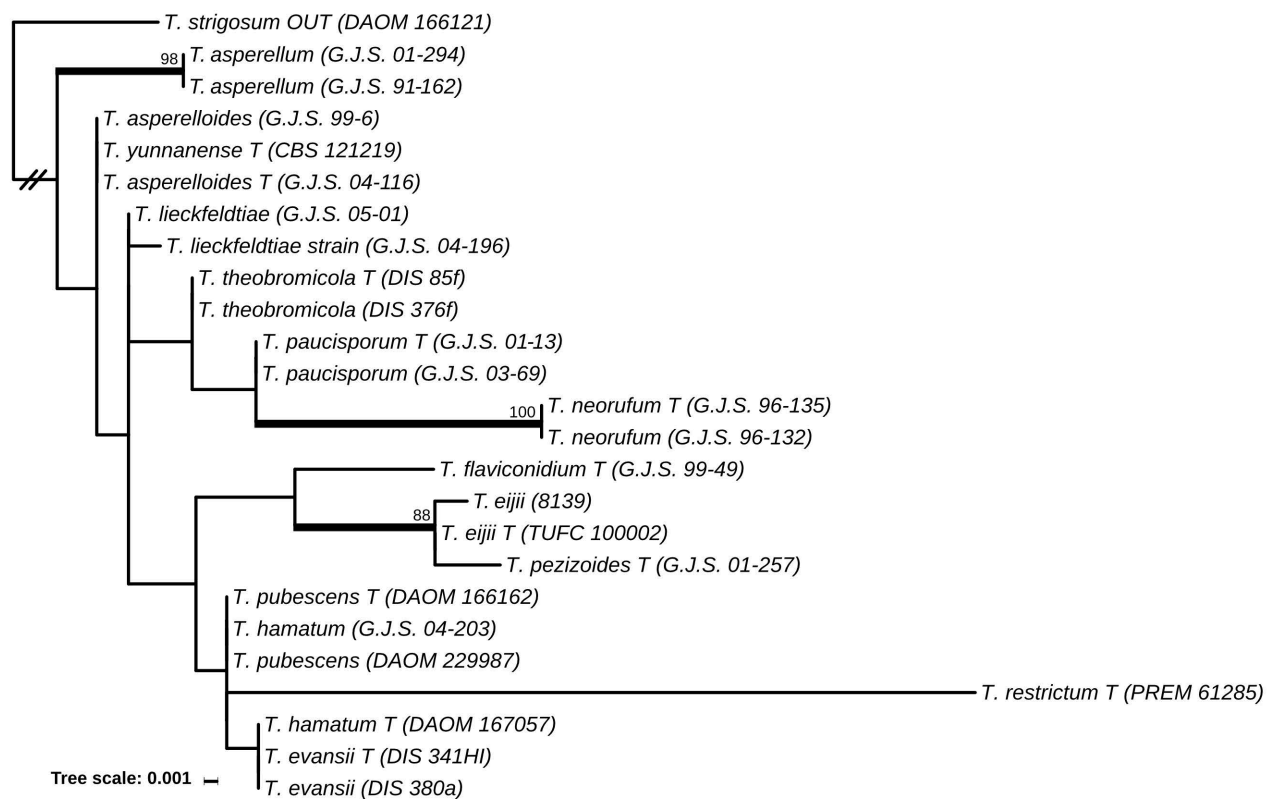

**Supplementary Figure 8.** Maximum likelihood phylogenetic tree of *Trichoderma* spp. from the *Hamatum* clade. The tree was reconstructed based on an ITS sequence dataset. Bootstrap values are indicated at well supported nodes together with thickened branches.
