# Supplementary material
Source: publisher figshare collection journal article supplement (https://tandf.figshare.com/articles/dataset/_/6886520)

**Supplementary Figure 11.** Map of South Africa illustrating the locations where soil samples were taken during this study (black crosses). The triangles indicate the sites which yielded new species of *Trichoderma*, red = *T. chetii*, light blue = *T. restrictum*, orange = *T. undulatum*, purple = *T. caeruleimontis* and green = *T. beinartii*. Bar = 400 km.

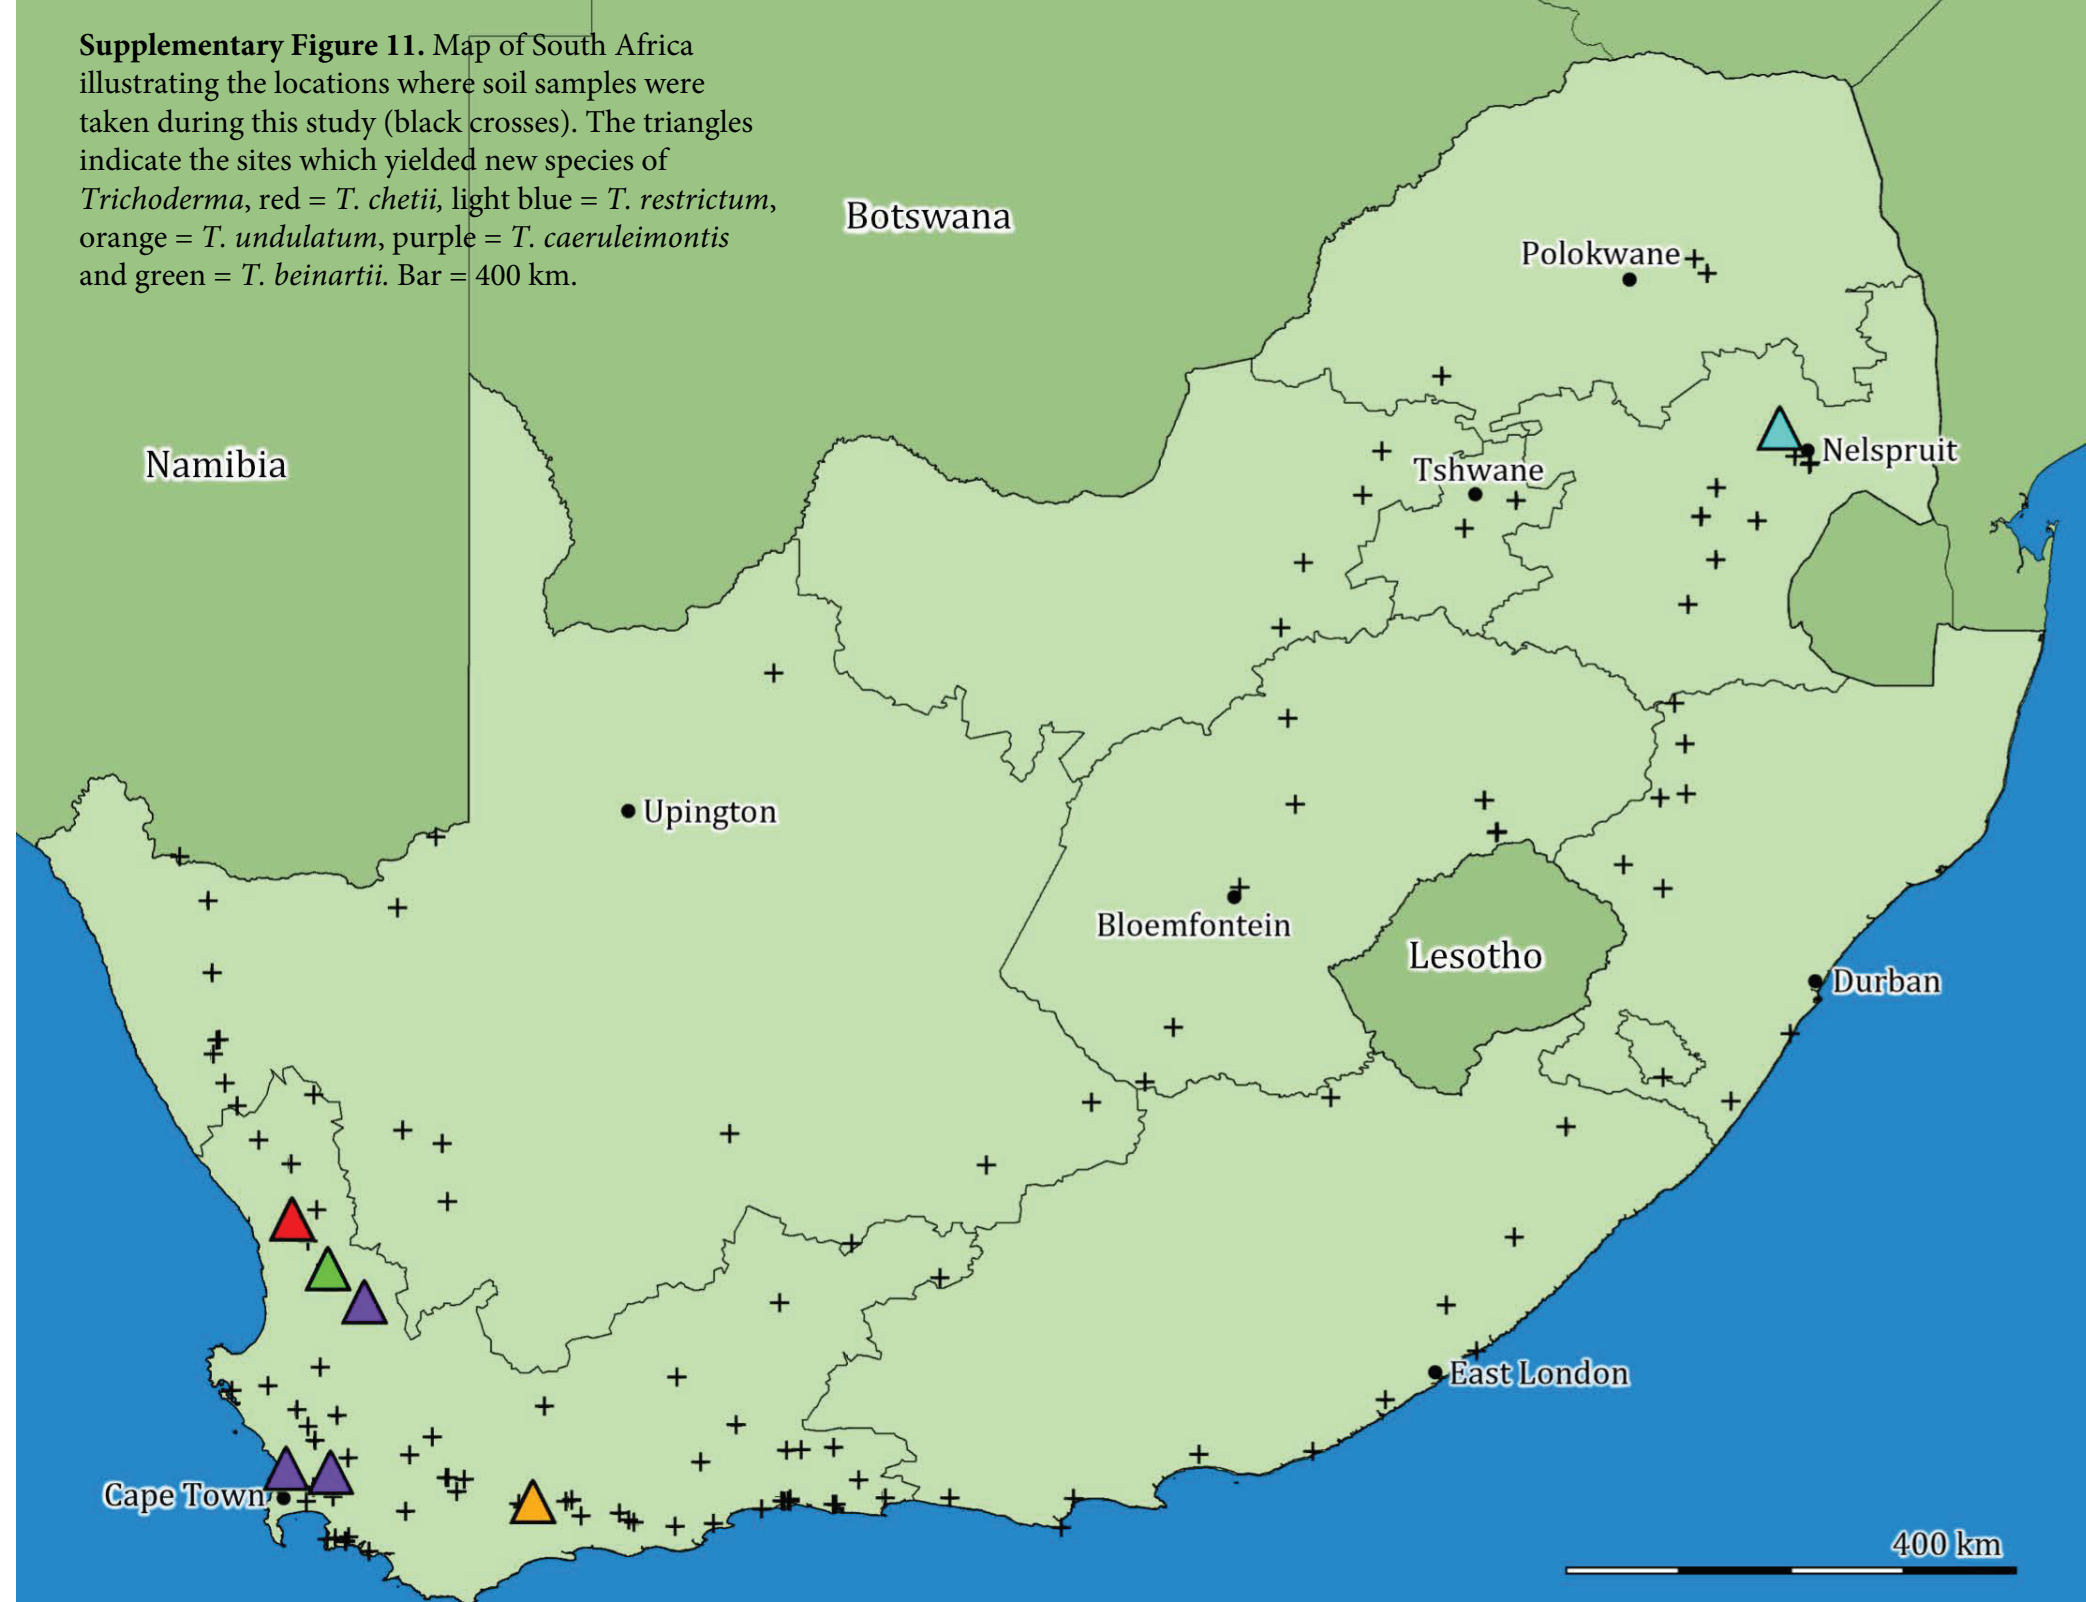

Supplement: Supplementary file 6 [file 1]
